# Supplementary material
Source: publisher figshare collection journal article supplement (https://acs.figshare.com/ndownloader/files/18037904)
Supplement: Supplementary file 1 [file 18037904]

## **Supporting information**

### **Amino-functionalized single-walled carbon nanotubes-integrated polyurethane phase change composites with superior photothermal conversion efficiency and thermal conductivity**

Xiaosheng Du, Jianing Xu, Sha Deng, Zongliang Du, Xu Cheng, and Haibo Wang\*

College of Biomass Science and Engineering, Sichuan University, No.24 South Section 1, Yihuan Road, Chengdu, 610065, China.

\*Corresponding Authors: E-mail: whb6985@scu.edu.cn. Tel: 86-28-85401296.

Number of pages: 5

Number of figures: 4

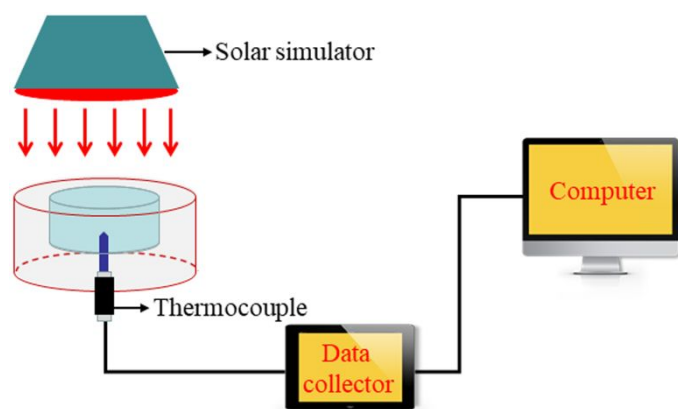

**Figure S1.** Schematic diagram of solar-thermal conversion experimental device.

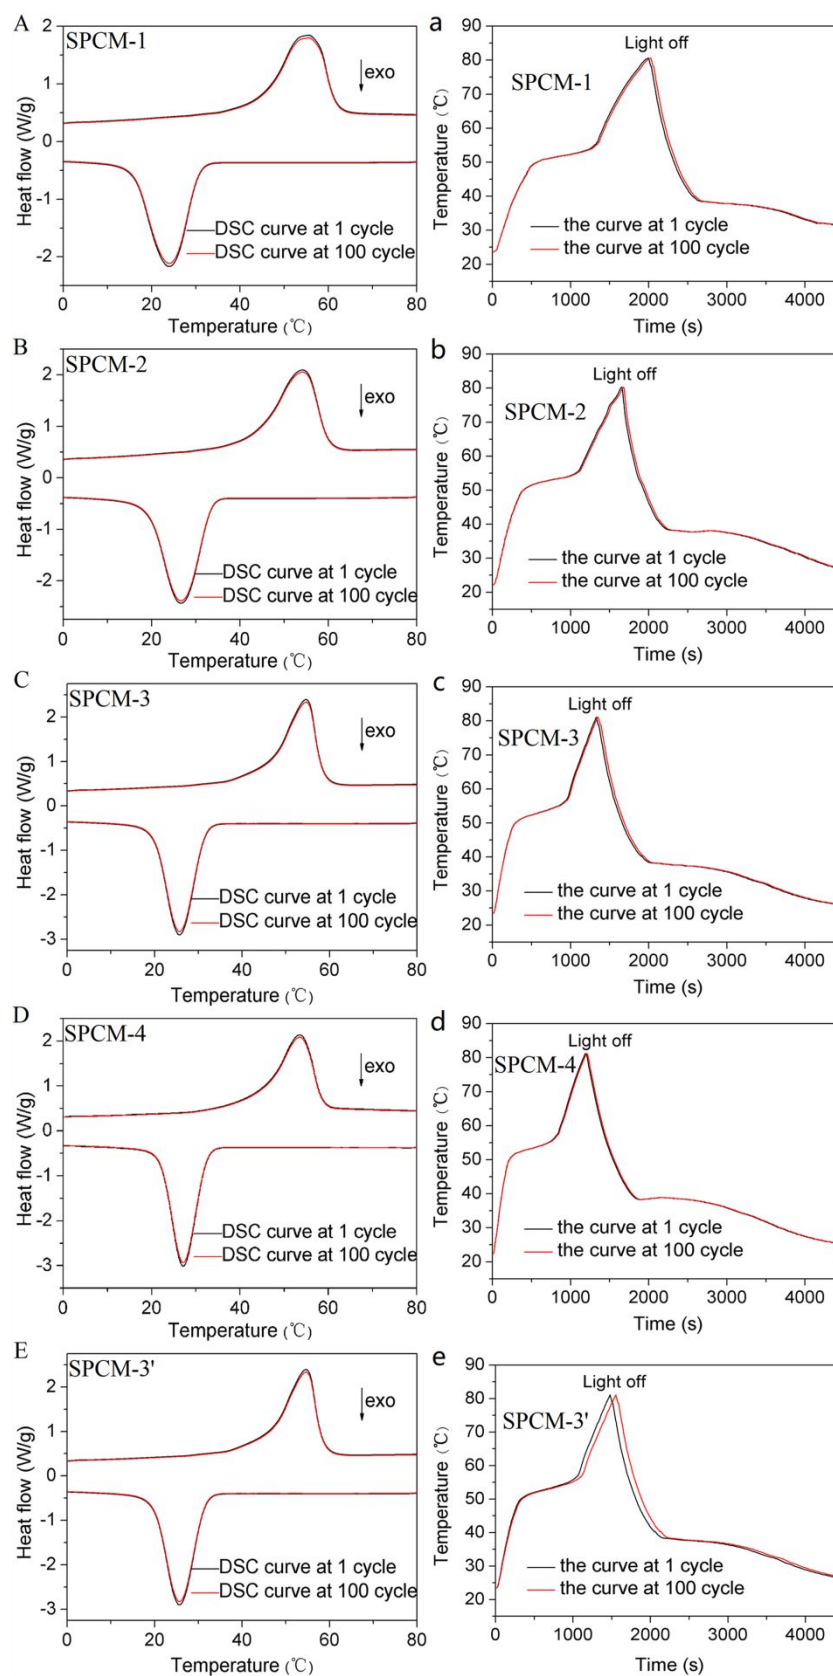

**Figure S2.** DSC curves (A-E) and temperature variation curves (a-e) of the SPCMs before and after 100 cycles of light irradiation.

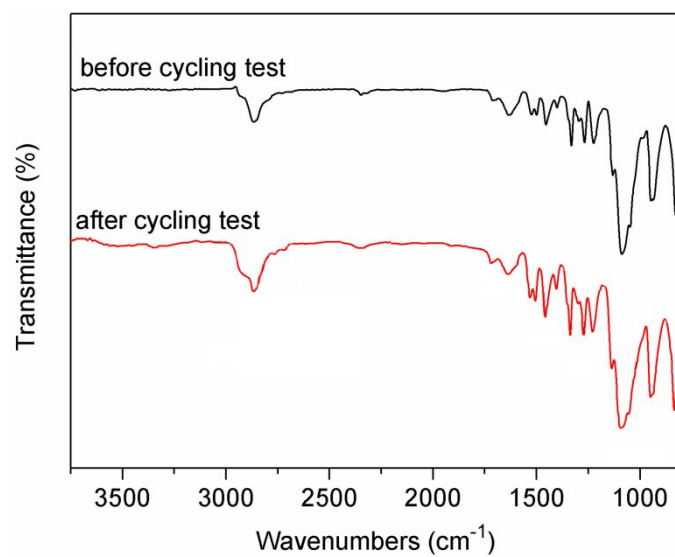

**Figure S3.** FTIR spectrum of SPCM-3 before and after 100 cycles of light irradiation tests.

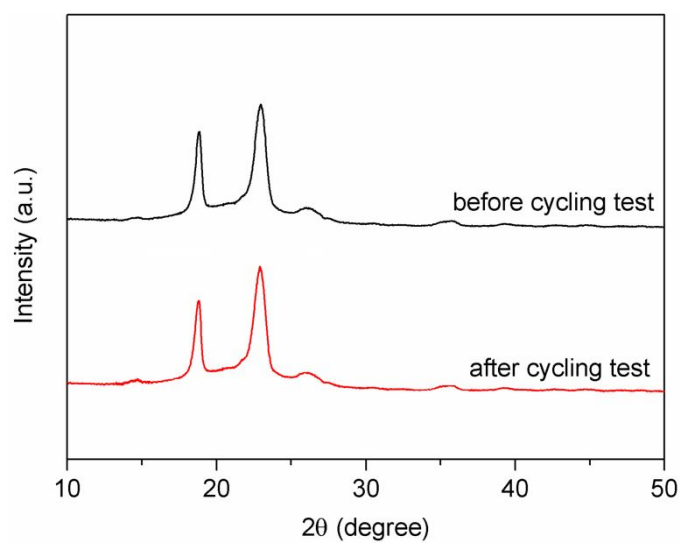

**Figure S4.** XRD pattern of SPCM-3 before and after 100 cycles of light irradiation tests.
